# Supplementary material for: Cross-cohort analysis identified an immune checkpoint-based signature to predict the clinical outcomes of neuroblastoma
Source: HighWire-hosted journal article supplement (doi:10.1136/jitc-2022-005980), 2023-05-01
Supplement: jitc-2022-005980supp002_data_supplement.pdf [file jitc-2022-005980supp002_data_supplement.pdf]

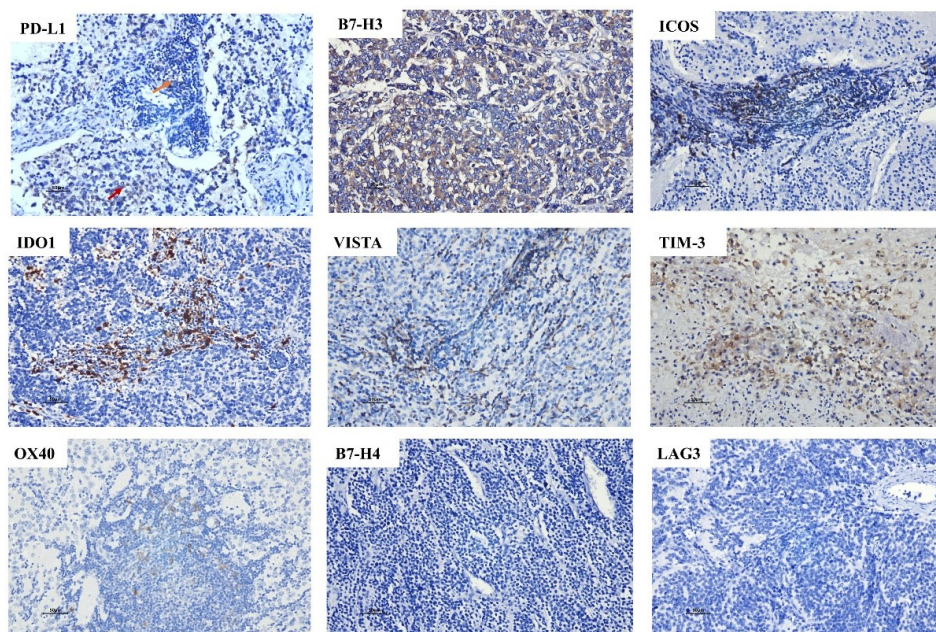

**Supplementary Figure S1. Representative images of nine immune checkpoints in NB FFPE samples determined by IHC.** The immune checkpoint PD-L1 shows positive expression in both compartments of tumor cells (*dark red arrow indicated*) and tumor-associated immune cells (*orange arrow indicated*), and B7-H3 only in tumor cells; IDO1, VISTA, TIM-3, ICOS, and OX40 are only expressed in tumor-associated immune cells; B7-H4 and LAG3 are not expressed in the NB FFPE samples (original magnification, 200×).

**Abbreviations:** NB, neuroblastoma; IHC, immunohistochemistry; FFPE, formalin-fixed, paraffin-embedded; PD-L1, programmed death-ligand 1; IDO, indoleamine-pyrrole 2,3-dioxygenase; LAG3, lymphocyte activation gene 3; TIM-3, T cell immunoglobulin and mucin domain containing-3; ICOS, inducible costimulatory molecule; OX40, costimulatory molecule 40.
