# Supplementary material for: Cross-cohort analysis identified an immune checkpoint-based signature to predict the clinical outcomes of neuroblastoma
Source: HighWire-hosted journal article supplement (doi:10.1136/jitc-2022-005980), 2023-05-01
Supplement: jitc-2022-005980supp004_data_supplement.pdf [file jitc-2022-005980supp004_data_supplement.pdf]

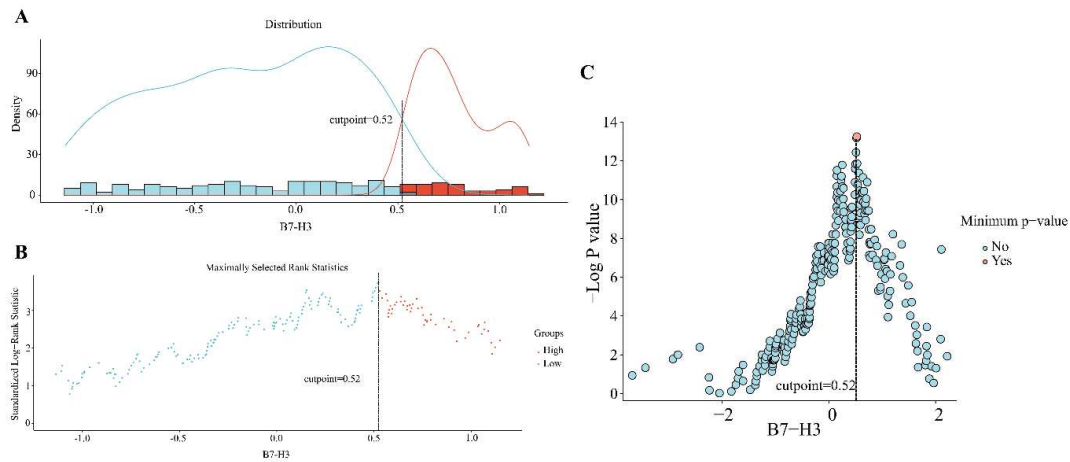

**Supplementary Figure S3.** An example of the variable grouping, B7-H3, using the minimum  $P$  value method capable of exploring the prognostic value of variables as much as possible. (A) The distribution of B7-H3 expression with density in the discovery set. (B) Scatter plot showing the relationship between the threshold of B7-H3 and the standard log-rank statistic. The peak value of the scatter plot indicates that when the grouping threshold is set to 0.52, the standard log-rank statistic is the largest. Furthermore, these two groups had the most significant difference in the OS rate. (C) Scatter plot of the  $P$  value of the survival analysis against the grouping threshold. The dotted line represents the best threshold. When the group threshold was set to 0.52, the  $P$  value obtained by the log-rank survival analysis was the smallest, and furthermore, the rank statistic reached its peak.

**Abbreviation:** OS, overall survival.
