# Supplementary material for: Cross-cohort analysis identified an immune checkpoint-based signature to predict the clinical outcomes of neuroblastoma
Source: HighWire-hosted journal article supplement (doi:10.1136/jitc-2022-005980), 2023-05-01
Supplement: jitc-2022-005980supp005_data_supplement.xlsx [file jitc-2022-005980supp005_data_supplement.xlsx]

## Sheet: Sheet1
Supplementary Table S1. The detailed information on the primary and metastatic sites of NB, as well as the treatment protocols for NB patients
Case No.	Tissue sample origins	Primary site	Tissue samples received Pre-oper chemo	Post-oper chemo	Age	INSS	MYCN	COG	Sex	Grade	MKI	OS	OStime	EFS	EFStime
P001	Primary_thoracic		CEDC/ICE	ICE	<18 M	Early	Nonamp	nonHigh	Male	Undifferentiated or Poorly Differentiated	High	0	1767	0	1767
P002	Primary_thoracic		Without pre-oper chemo	CAV/EP	>18 M	Early	Nonamp	nonHigh	Male	Differentiating	Low	0	939	0	939
P003	Primary_thoracic		Without pre-oper chemo	CAV/EP	>18 M	Early	Nonamp	nonHigh	Female	Differentiating	Low	0	840	0	840
P004	Primary_thoracic		Without pre-oper chemo	No chemo applied	<18 M	Early	Nonamp	nonHigh	Male	Undifferentiated or Poorly Differentiated	High	0	993	0	993
P005	Primary_thoracic		Without pre-oper chemo	No chemo applied	<18 M	Advanced	Nonamp	nonHigh	Male	Undifferentiated or Poorly Differentiated	High	0	789	1	242
P006	Primary_thoracic		Without pre-oper chemo	No chemo applied	<18 M	Advanced	Nonamp	nonHigh	Male	Undifferentiated or Poorly Differentiated	High	0	466	0	295
P007	Primary_thoracic		Without pre-oper chemo	CAV/CE	<18 M	Advanced	Nonamp	nonHigh	Female	Differentiating	Low	0	445	1	288
P008	Primary_thoracic		Without pre-oper chemo	No chemo applied	<18 M	Early	Nonamp	nonHigh	Male	Undifferentiated or Poorly Differentiated	Low	0	1513	0	1513
P009	Primary_thoracic		Without pre-oper chemo	CAV/EP	<18 M	Advanced	Nonamp	nonHigh	Female	Undifferentiated or Poorly Differentiated	Low	0	1429	0	1429
P010	Primary_retroperitoneal		CAV/EP	CEDC/ICE	<18 M	Advanced	Nonamp	High	Female	Differentiating	Low	0	476	1	395
P011	Primary_thoracic		Without pre-oper chemo	No chemo applied	<18 M	Advanced	Nonamp	nonHigh	Male	Differentiating	Intermediate	0	1410	0	1410
P012	Primary_thoracic		Without pre-oper chemo	No chemo applied	<18 M	Advanced	Nonamp	nonHigh	Female	Undifferentiated or Poorly Differentiated	Low	0	608	0	608
P013	Primary_thoracic		Without pre-oper chemo	No chemo applied	<18 M	Advanced	Nonamp	nonHigh	Male	Undifferentiated or Poorly Differentiated	High	0	28	0	28
P014	Metastatic_LN	adrenal gland	Without pre-oper chemo	na	>18 M	Advanced	Nonamp	High	Male	Undifferentiated or Poorly Differentiated	Low	0	15	0	15
P015	Primary_thoracic		Without pre-oper chemo	No chemo applied	<18 M	Early	Nonamp	nonHigh	Male	Undifferentiated or Poorly Differentiated	Low	0	1562	0	1562
P016	Primary_thoracic		Without pre-oper chemo	CEDC	>18 M	Advanced	Nonamp	High	Female	Undifferentiated or Poorly Differentiated	Low	1	384	1	384
P017	Metastatic_spinal	adrenal gland	Without pre-oper chemo	No chemo applied	>18 M	Advanced	Nonamp	High	Male	Undifferentiated or Poorly Differentiated	na	1	462	1	462
P018	Primary_thoracic		Without pre-oper chemo	No chemo applied	<18 M	Early	Nonamp	nonHigh	Female	Undifferentiated or Poorly Differentiated	Low	0	415	0	415
P019	Primary_thoracic		Without pre-oper chemo	CAV/EP	<18 M	Advanced	Nonamp	nonHigh	Female	Undifferentiated or Poorly Differentiated	High	0	1490	0	1490
P020	Primary_thoracic		Without pre-oper chemo	No chemo applied	<18 M	Early	Nonamp	nonHigh	Male	Undifferentiated or Poorly Differentiated	Intermediate	0	1361	0	1361
P021	Primary_adrenal gland		Without pre-oper chemo	CEDC/ICE	>18 M	Advanced	Nonamp	High	Female	Undifferentiated or Poorly Differentiated	Low	1	283	1	283
P022	Primary_thoracic		Without pre-oper chemo	CAV/EP	<18 M	Early	Nonamp	nonHigh	Male	Undifferentiated or Poorly Differentiated	Intermediate	0	1332	0	1332
P023	Primary_thoracic		Without pre-oper chemo	na	<18 M	Early	Nonamp	nonHigh	Male	Undifferentiated or Poorly Differentiated	Low	0	1487	0	1487
P024	Primary_adrenal gland		Without pre-oper chemo	No chemo applied	<18 M	Early	Nonamp	nonHigh	Male	Undifferentiated or Poorly Differentiated	Low	0	1429	0	1429
P025	Primary_adrenal gland		Without pre-oper chemo	No chemo applied	>18 M	Early	Nonamp	nonHigh	Female	Undifferentiated or Poorly Differentiated	Low	0	1499	0	1499
P026	Primary_adrenal gland		Without pre-oper chemo	No chemo applied	<18 M	Early	Nonamp	nonHigh	Male	Undifferentiated or Poorly Differentiated	High	0	1709	0	1709
P027	Primary_adrenal gland		Without pre-oper chemo	No chemo applied	<18 M	Early	Nonamp	nonHigh	Male	Undifferentiated or Poorly Differentiated	Intermediate	0	1529	0	1529
P028	Primary_retroperitoneal		Without pre-oper chemo	No chemo applied	<18 M	Early	Nonamp	nonHigh	Male	Differentiating	Low	0	1546	0	1546
P029	Primary_retroperitoneal		VIP/CAV/VIP/CAV/VIP/CDEC/ICE/CDEC/ICE	CDEC/ICE/IVT	>18 M	Advanced	Nonamp	High	Male	Undifferentiated or Poorly Differentiated	Low	0	693	0	693
P030	Primary_adrenal gland		Without pre-oper chemo	No chemo applied	<18 M	Advanced	Nonamp	nonHigh	Male	Undifferentiated or Poorly Differentiated	Low	0	690	0	690
P031	Primary_thoracic		Without pre-oper chemo	CAV/EP	<18 M	Advanced	Nonamp	nonHigh	Male	Undifferentiated or Poorly Differentiated	Low	0	435	0	435
P032	Primary_retroperitoneal		CAV/ICE/CEDC	CEDC/ICE/	>18 M	Advanced	Nonamp	High	Female	Undifferentiated or Poorly Differentiated	Low	1	494	1	494
P033	Metastatic_spinal	thoracic	na	CEDC, no radiotherapy	<18 M	Advanced	Nonamp	nonHigh	Female	Undifferentiated or Poorly Differentiated	Low	0	1092	1	482
P034	Primary_thoracic		Without pre-oper chemo	No chemo applied	<18 M	Advanced	Nonamp	High	Female	Undifferentiated or Poorly Differentiated	High	0	18	0	18
P035	Metastatic_LN	adrenal gland	CAV/EP	CAV/EP	<18 M	Advanced	Nonamp	nonHigh	Male	Undifferentiated or Poorly Differentiated	na	0	595	0	595
P036	Primary_thoracic		Without pre-oper chemo	No chemo applied	<18 M	Early	Nonamp	nonHigh	Female	Undifferentiated or Poorly Differentiated	Intermediate	0	1669	0	1669
P037	Primary_thoracic		Without pre-oper chemo	No chemo applied	<18 M	Early	Nonamp	nonHigh	Male	Undifferentiated or Poorly Differentiated	High	0	1252	0	1252
P038	Primary_adrenal gland		Without pre-oper chemo	No chemo applied	<18 M	Early	Nonamp	nonHigh	Female	Undifferentiated or Poorly Differentiated	Low	0	1842	0	1842
P039	Primary_thoracic		Without pre-oper chemo	EP/ICE/CEDC	>18 M	Advanced	Nonamp	High	Female	Undifferentiated or Poorly Differentiated	Low	1	569	1	569
P040	Primary_thoracic		Without pre-oper chemo	No chemo applied	<18 M	Advanced	Nonamp	nonHigh	Female	Undifferentiated or Poorly Differentiated	Low	0	1922	1	1058
P041	Primary_thoracic		Without pre-oper chemo	CEDC	>18 M	Advanced	Nonamp	High	Female	Undifferentiated or Poorly Differentiated	High	0	1674	0	1674
P042	Primary_retroperitoneal		Without pre-oper chemo	CAV/EP	>18 M	Early	Nonamp	nonHigh	Female	Differentiating	Low	0	1652	0	1652
P043	Primary_adrenal gland		Without pre-oper chemo	No chemo applied	<18 M	Early	Nonamp	nonHigh	Female	Undifferentiated or Poorly Differentiated	Low	0	827	0	827
P044	Primary_thoracic		Without pre-oper chemo	CTX/VP16+VRN	>18 M	Early	Nonamp	High	Male	Differentiating	Low	0	2544	1	383
P045	Metastatic_brain	retroperitoneal	Without pre-oper chemo	CEDC/ICE	>18 M	Advanced	Amp	High	Female	Undifferentiated or Poorly Differentiated	na	0	491	0	491
P046	Metastatic_LN	thoracic	Without pre-oper chemo	OEPC/VDC/ICD/EPI+VCR+CTX	>18 M	Advanced	Nonamp	High	Female	Undifferentiated or Poorly Differentiated	Low	0	1072	1	622
P047	Primary_retroperitoneal		Without pre-oper chemo	No chemo applied	<18 M	Early	Nonamp	nonHigh	Male	Undifferentiated or Poorly Differentiated	Low	0	1902	0	1902
P048	Primary_adrenal gland		Without pre-oper chemo	No chemo applied	<18 M	Early	Nonamp	nonHigh	Female	Undifferentiated or Poorly Differentiated	na	0	295	0	295
P049	Metastatic_LN	retroperitoneal	Without pre-oper chemo	CAV/EP	>18 M	Advanced	Nonamp	nonHigh	Female	Undifferentiated or Poorly Differentiated	High	0	599	1	240
P050	Primary_adrenal gland		Without pre-oper chemo	CAV	<18 M	Early	Nonamp	nonHigh	Female	Undifferentiated or Poorly Differentiated	Low	0	504	0	504
P051	Primary_retroperitoneal		CAV/EP	CAV/EP	>18 M	Early	Nonamp	nonHigh	Male	Differentiating	Low	0	582	0	582
P052	Primary_retroperitoneal		VIP/CAV	CEDC/radio	>18 M	Advanced	Nonamp	High	Male	Differentiating	Low	1	836	1	437
P053	Primary_thoracic		Without pre-oper chemo	No chemo applied	<18 M	Early	Nonamp	nonHigh	Male	Undifferentiated or Poorly Differentiated	High	0	1965	0	1965
P054	Primary_thoracic		Without pre-oper chemo	No chemo applied	<18 M	Early	Nonamp	nonHigh	Male	Undifferentiated or Poorly Differentiated	Low	0	1802	0	1802
P055	Primary_thoracic		Without pre-oper chemo	na	>18 M	Early	Nonamp	nonHigh	Female	Differentiating	Low	1	1669	1	1669
P056	Primary_adrenal gland		CEDC/ICE	EP/ICE/IVT/AD	<18 M	Advanced	Amp	High	Female	Undifferentiated or Poorly Differentiated	Low	1	490	1	490
P057	Primary_retroperitoneal		Without pre-oper chemo	EP/ICE/CEDC/Isotretinoin	>18 M	Advanced	Amp	High	Female	Undifferentiated or Poorly Differentiated	High	0	2101	1	1150
P058	Primary_adrenal gland		Without pre-oper chemo	CAV/EP/ICE/CEDC	<18 M	Early	Nonamp	nonHigh	Male	Undifferentiated or Poorly Differentiated	Low	0	535	1	98
P059	Primary_adrenal gland		Without pre-oper chemo	No chemo applied	<18 M	Early	Nonamp	nonHigh	Female	Undifferentiated or Poorly Differentiated	High	0	486	0	486
P060	Primary_adrenal gland		Without pre-oper chemo	No chemo applied	<18 M	Early	Nonamp	nonHigh	Male	Undifferentiated or Poorly Differentiated	Low	0	834	0	834
P061	Primary_adrenal gland		CAV	No chemo applied	>18 M	Advanced	Amp	High	Male	Undifferentiated or Poorly Differentiated	Low	0	783	0	783
P062	Primary_adrenal gland		Without pre-oper chemo	No chemo applied	<18 M	Early	Nonamp	nonHigh	Male	Undifferentiated or Poorly Differentiated	Low	1	48	1	48
P063	Primary_adrenal gland		EP/CAV	CAV/EP/CEDC/IVT	<18 M	Advanced	Amp	High	Male	Differentiating	Low	1	491	1	173
P064	Primary_retroperitoneal		Without pre-oper chemo	CAV/EP/ Isotretinoin	>18 M	Advanced	Nonamp	High	Male	Undifferentiated or Poorly Differentiated	Low	0	963	0	963
P065	Primary_retroperitoneal		Without pre-oper chemo	ICE/CAV	>18 M	Advanced	Nonamp	nonHigh	Female	Undifferentiated or Poorly Differentiated	Intermediate	0	2985	0	2985
P066	Primary_adrenal gland		VIP/CAV	VIP/CAV/EP/IVT/radio	>18 M	Advanced	Nonamp	High	Male	Undifferentiated or Poorly Differentiated	Intermediate	0	933	1	314
P067	Primary_adrenal gland		CEDC/ICE	CAV/Autologous Stem Cell Transplant /radio/Isotretinoin	>18 M	Advanced	Nonamp	High	Female	Undifferentiated or Poorly Differentiated	na	0	1118	0	1118
P068	Primary_adrenal gland		Without pre-oper chemo	CAV/EP	<18 M	Advanced	Nonamp	nonHigh	Female	Undifferentiated or Poorly Differentiated	Low	0	581	0	581
P069	Metastatic_LN	retroperitoneal	Without pre-oper chemo	CDEC/ICE	>18 M	Advanced	Nonamp	High	Male	Undifferentiated or Poorly Differentiated	Intermediate	1	857	1	857
P070	Primary_thoracic		Without pre-oper chemo	No chemo applied	<18 M	Early	Nonamp	nonHigh	Male	Undifferentiated or Poorly Differentiated	Low	0	2189	0	2189
P071	Primary_thoracic		Without pre-oper chemo	CAV/EP	>18 M	Advanced	Nonamp	nonHigh	Female	Undifferentiated or Poorly Differentiated	Low	0	2050	0	2050
P072	Primary_retroperitoneal		Without pre-oper chemo	CAV/EP	<18 M	Early	Nonamp	nonHigh	Male	Undifferentiated or Poorly Differentiated	High	0	1720	0	1720
P073	Metastatic_brain	na	Without pre-oper chemo	na	>18 M	Advanced	Nonamp	High	Female	Undifferentiated or Poorly Differentiated	na	1	442	1	442
P074	Metastatic_LN	thoracic	Without pre-oper chemo	No chemo applied	>18 M	Advanced	Nonamp	High	Male	Undifferentiated or Poorly Differentiated	Intermediate	1	1	1	1
P075	Primary_thoracic		Without pre-oper chemo	No chemo applied	<18 M	Early	Nonamp	High	Female	Undifferentiated or Poorly Differentiated	High	0	282	1	272
P076	Primary_thoracic		Without pre-oper chemo	CAV/EP	>18 M	Advanced	Nonamp	nonHigh	Male	Differentiating	Low	0	743	0	743
P077	Metastatic_brain	adrenal gland	Without pre-oper chemo	No chemo applied	<18 M	Advanced	Amp	High	Male	Undifferentiated or Poorly Differentiated	Low	0	601	0	601
P078	Primary_retroperitoneal		Without pre-oper chemo	CEDC/ICE	>18 M	Advanced	Nonamp	High	Male	Undifferentiated or Poorly Differentiated	Low	0	534	1	233
P079	Primary_thoracic		Without pre-oper chemo	No chemo applied	<18 M	Early	Nonamp	nonHigh	Male	Undifferentiated or Poorly Differentiated	Low	0	1315	0	1315
P080	Primary_thoracic		Without pre-oper chemo	CAV/EP	<18 M	Advanced	Nonamp	nonHigh	Female	Undifferentiated or Poorly Differentiated	High	0	867	0	867
P081	Primary_thoracic		Without pre-oper chemo	CAV/EP	<18 M	Advanced	Nonamp	nonHigh	Female	Undifferentiated or Poorly Differentiated	High	0	235	1	235
P082	Primary_adrenal gland		Without pre-oper chemo	CAV/EP	<18 M	Early	Nonamp	nonHigh	Male	Undifferentiated or Poorly Differentiated	Intermediate	0	878	0	878
P083	Primary_retroperitoneal		CAV/ICE/CEDC	ICE/CEDC	<18 M	Advanced	Amp	High	Male	na	na	0	992	0	992
P084	Primary_retroperitoneal		CAV/VIP	No chemo applied	>18 M	Advanced	Nonamp	High	Male	Undifferentiated or Poorly Differentiated	na	0	1240	1	1067
P085	Primary_adrenal gland		Without pre-oper chemo	CAV/EP	>18 M	Early	Nonamp	High	Female	Undifferentiated or Poorly Differentiated	Low	0	1308	0	1308
P086	Primary_adrenal gland		Without pre-oper chemo	No chemo applied	<18 M	Early	Nonamp	nonHigh	Female	Undifferentiated or Poorly Differentiated	Low	0	1080	0	1080
P087	Primary_retroperitoneal		Without pre-oper chemo	CEDC/ICE	>18 M	Advanced	Nonamp	High	Female	Undifferentiated or Poorly Differentiated	Low	0	1205	1	574
P088	Metastatic_LN	adrenal gland	CEDC/ICE	CEDC/ICE	>18 M	Advanced	Nonamp	High	Male	na	na	1	771	1	626
P089	Primary_retroperitoneal		Without pre-oper chemo	CAV/EP	>18 M	Advanced	Nonamp	nonHigh	Female	Differentiating	na	0	440	1	222
P090	Primary_thoracic		Without pre-oper chemo	CAV/EP/CEDC/ICE	<18 M	Advanced	Nonamp	nonHigh	Female	Undifferentiated or Poorly Differentiated	Low	0	1092	1	482
P091	Metastatic_LN	retroperitoneal	Without pre-oper chemo	CEDC/ICE	>18 M	Advanced	Nonamp	High	Female	Undifferentiated or Poorly Differentiated	Low	0	1205	1	574
P092	Primary_retroperitoneal		CAV/VIP	CEDC/ICE/IVT	>18 M	Advanced	Nonamp	High	Male	Undifferentiated or Poorly Differentiated	Low	0	693	0	693
P093	Metastatic_LN	retroperitoneal	VIP/CAV/VIP/CAV/VIP/CDEC/ICE/CDEC/ICE	CDEC/ICE/IVT/radio	>18 M	Advanced	Nonamp	High	Male	Undifferentiated or Poorly Differentiated	Low	0	693	0	693
P094	Primary_adrenal gland		Without pre-oper chemo	CAV/VIP	>18 M	Advanced	Nonamp	High	Male	Differentiating	Low	0	1075	0	1075
P095	Metastatic_LN	adrenal gland	CAV/VIP	CAV/VIP	>18 M	Advanced	Nonamp	High	Male	Differentiating	Low	0	1075	0	1075
P096	Primary_adrenal gland		Without pre-oper chemo	CAV/EP	>18 M	Early	Nonamp	High	Male	Undifferentiated or Poorly Differentiated	Low	0	1002	0	1002
P097	Metastatic_liver	retroperitoneal	CEDC/ICE	CEDC/ICE	>18 M	Advanced	Nonamp	High	Male	Undifferentiated or Poorly Differentiated	Low	0	1027	1	751
P098	Metastatic_LN	retroperitoneal	CEDC/ICE	CEDC/ICE	>18 M	Advanced	Nonamp	High	Male	Undifferentiated or Poorly Differentiated	Low	0	1027	1	751
P099	Metastatic_LN	retroperitoneal	Without pre-oper chemo	VIP/IC/IVT	<18 M	Advanced	Nonamp	nonHigh	Female	Undifferentiated or Poorly Differentiated	High	0	1138	1	753
P100	Primary_retroperitoneal		ICE/CEDC	ICE/CEDC/Autologous Stem Cell Transplant	>18 M	Advanced	Nonamp	High	Male	Undifferentiated or Poorly Differentiated	Low	0	1027	1	751
P101	Metastatic_LN	retroperitoneal	Without pre-oper chemo	IVT/FC	>18 M	Advanced	Amp	High	Male	Undifferentiated or Poorly Differentiated	High	0	707	1	484
P102	Primary_retroperitoneal		Without pre-oper chemo	CAV	>18 M	Advanced	Nonamp	nonHigh	Female	Differentiating	Low	0	1507	0	1507
P103	Primary_thoracic		Without pre-oper chemo	No chemo applied	<18 M	Early	Nonamp	nonHigh	Female	Undifferentiated or Poorly Differentiated	Low	0	842	0	842
P104	Primary_thoracic		Without pre-oper chemo	CAV	<18 M	Early	Nonamp	nonHigh	Male	Undifferentiated or Poorly Differentiated	High	0	662	0	662
P105	Primary_retroperitoneal		Without pre-oper chemo	No chemo applied	<18 M	Advanced	Nonamp	nonHigh	Female	Undifferentiated or Poorly Differentiated	High	0	568	0	568
P106	Primary_thoracic		Without pre-oper chemo	CEDC/ICE	>18 M	Advanced	Nonamp	High	Female	Undifferentiated or Poorly Differentiated	High	1	635	1	574
P107	Primary_thoracic		Without pre-oper chemo	No chemo applied	<18 M	Early	Nonamp	nonHigh	Male	Undifferentiated or Poorly Differentiated	High	0	1069	0	1069
P108	Primary_thoracic		Without pre-oper chemo	No chemo applied	>18 M	Advanced	Nonamp	High	Female	Differentiating	Low	0	1231	0	1231
P109	Primary_thoracic		Without pre-oper chemo	CAV/EP/Isotretinoin	>18 M	Advanced	Nonamp	High	Male	Undifferentiated or Poorly Differentiated	Low	0	1153	1	687
P110	Primary_thoracic		Without pre-oper chemo	No chemo applied	<18 M	Early	Nonamp	nonHigh	Female	Undifferentiated or Poorly Differentiated	High	0	1171	0	1171
P111	Primary_thoracic		Without pre-oper chemo	EP/CAV	<18 M	Early	Nonamp	nonHigh	Male	Undifferentiated or Poorly Differentiated	Low	0	926	0	926
P112	Primary_thoracic		Without pre-oper chemo	No chemo applied	>18 M	Early	Nonamp	nonHigh	Male	Differentiating	Low	0	901	0	901
P113	Primary_retroperitoneal		Without pre-oper chemo	No chemo applied	<18 M	Early	Nonamp	nonHigh	Male	Undifferentiated or Poorly Differentiated	High	0	1679	0	1679
P114	Primary_thoracic		Without pre-oper chemo	ICE/CEDC	>18 M	Advanced	Nonamp	High	Male	Undifferentiated or Poorly Differentiated	High	0	396	0	396
P115	Metastatic_liver	adrenal gland	CEDC/ICE	CEDC/ICE	>18 M	Advanced	Amp	High	Male	Undifferentiated or Poorly Differentiated	na	1	551	1	551
P116	Primary_retroperitoneal		Without pre-oper chemo	CEDC/ICE	>18 M	Advanced	Nonamp	nonHigh	Male	Undifferentiated or Poorly Differentiated	Low	0	1727	0	1727
P117	Primary_retroperitoneal		Without pre-oper chemo	No chemo applied	<18 M	Early	Nonamp	nonHigh	Male	Undifferentiated or Poorly Differentiated	High	0	493	0	493
P118	Primary_thoracic		Without pre-oper chemo	No chemo applied	<18 M	Early	Nonamp	nonHigh	Male	Undifferentiated or Poorly Differentiated	High	0	1099	0	1099
P119	Primary_thoracic		Without pre-oper chemo	CAV/radio	<18 M	Advanced	Nonamp	nonHigh	Female	Differentiating	Low	0	1258	0	1258
P120	Primary_thoracic		CAV/EP	No chemo applied	<18 M	Advanced	Nonamp	nonHigh	Female	Differentiating	Low	0	1731	0	1731
P121	Primary_retroperitoneal		CAV/VIP	na	>18 M	Advanced	Amp	High	Female	Differentiating	Low	0	873	0	873
P122	Primary_adrenal gland		Without pre-oper chemo	CAV/VIP/radio	>18 M	Advanced	Nonamp	High	Male	Differentiating	Intermediate	0	423	0	423
P123	Primary_adrenal gland		CAV/VIP	chemo (na)/radio exchange	>18 M	Advanced	Amp	High	Male	Undifferentiated or Poorly Differentiated	Low	0	550	0	550
P124	Primary_retroperitoneal		Without pre-oper chemo	CAV/EP	>18 M	Early	Nonamp	nonHigh	Female	Differentiating	Low	0	963	0	963
P125	Primary_adrenal gland		CEDC/ICE	IVT/radio	>18 M	Advanced	Amp	High	Male	Differentiating	Intermediate	0	824	1	450
P126	Primary_retroperitoneal		na	na	>18 M	Advanced	Amp	High	Male	Undifferentiated or Poorly Differentiated	High	1	142	1	162
P127	Primary_retroperitoneal		na	EP/CAC/VIP/radio	>18 M	Advanced	Amp	High	Female	Undifferentiated or Poorly Differentiated	High	0	733	0	733
P128	Primary_adrenal gland		na	Autologous Stem Cell Transplant	>18 M	Advanced	Nonamp	High	Male	Differentiating	Low	0	971	0	971
P129	Primary_adrenal gland		CEDC/ICE	CAV/VIP/radio/CTX/Topotecan	>18 M	Advanced	Nonamp	High	Male	Differentiating	Low	0	961	1	504
P130	Primary_adrenal gland		ATO/CAV	na	>18 M	Advanced	Nonamp	High	Female	Differentiating	Low	0	1084	0	1084
P131	Primary_retroperitoneal		CAV/EP	CAV/EP/radio	<18 M	Advanced	Nonamp	High	Female	Differentiating	Low	0	1191	0	1191
P132	Primary_retroperitoneal		Without pre-oper chemo	No chemo applied	>18 M	Advanced	Nonamp	High	Female	Differentiating	Low	1	599	1	599
P133	Primary_adrenal gland		na	na	>18 M	Advanced	Amp	High	Male	Differentiating	Intermediate	1	283	1	283
P134	Primary_adrenal gland		na	CAV/VIP/CAV/VIP/CAV /IVT/radio/IVT	>18 M	Advanced	Nonamp	High	Male	Undifferentiated or Poorly Differentiated	Low	0	1287	1	1287
P135	Primary_retroperitoneal		CAV/VIP	na	>18 M	Advanced	Nonamp	High	Male	Undifferentiated or Poorly Differentiated	Low	0	1098	0	1098
P136	Primary_adrenal gland		CAV	CAV/CT/EP /radio/IT/Apatinib	>18 M	Advanced	Amp	High	Male	Undifferentiated or Poorly Differentiated	Low	0	1166	0	1166
P137	Primary_adrenal gland		Without pre-oper chemo	EP/radio	>18 M	Advanced	Amp	High	Male	Undifferentiated or Poorly Differentiated	High	1	380	1	220
P138	Primary_adrenal gland		ATO/CAV/or ATO+CTX/TPO/VIP/ EP/CAV	EP/CAV/EP/CAV/radio/IVT/IE f/THP+nedaplatin	>18 M	Advanced	Nonamp	High	Male	Undifferentiated or Poorly Differentiated	Intermediate	1	870	1	870
P139	Primary_retroperitoneal		CAV/VIP	VIP/CAV/VIP/radio/CTX+VRN+VP16	>18 M	Advanced	Nonamp	High	Male	Undifferentiated or Poorly Differentiated	Low	0	1429	1	1230
P140	Primary_adrenal gland		EP/CAV/EP	VIP/CAV/radio/CTX+VP-16+VRN/surgery again/IVT /IC	>18 M	Advanced	Amp	High	Female	Undifferentiated or Poorly Differentiated	Intermediate	0	1450	1	532
P141	Primary_retroperitoneal		CAV/VIP /IVT	IVT/ADR+PTX/TPO+CTX	>18 M	Advanced	Nonamp	High	Male	Undifferentiated or Poorly Differentiated	Low	1	309	1	23
P142	Primary_adrenal gland		na	IFO+VP16+CBP/radio	>18 M	Advanced	Amp	High	Male	Differentiating	Low	0	1039	0	1039
P143	Primary_adrenal gland		na	na	>18 M	Advanced	Amp	High	Female	Undifferentiated or Poorly Differentiated	Low	0	1661	0	1661
P144	Primary_adrenal gland		EP/CAV/VIP	CAV/VIP/radio/CTX+VRN+VP16/Apatinib+IT	>18 M	Advanced	Nonamp	High	Male	Undifferentiated or Poorly Differentiated	Low	0	1541	1	1448
P145	Primary_adrenal gland		na	na/ radio	>18 M	Advanced	Nonamp	High	Male	Differentiating	Low	1	1284	1	1100
P146	Primary_adrenal gland		Without pre-oper chemo	CV/EP	>18 M	Early	Nonamp	nonHigh	Female	Differentiating	Low	0	1650	0	1650
P147	Primary_retroperitoneal		Without pre-oper chemo	No chemo applied	<18 M	Early	Nonamp	nonHigh	Male	Undifferentiated or Poorly Differentiated	Low	0	1724	0	1724
P149	Primary_adrenal gland		Without pre-oper chemo	na/radio/IFO+VCR+CPT11+ICE	>18 M	Advanced	Nonamp	High	Female	Differentiating	Low	1	999	1	709
P150	Primary_adrenal gland		Without pre-oper chemo	CED/ICE/radio	>18 M	Advanced	Nonamp	High	Male	Differentiating	Low	1	852	1	852
P151	Primary_thoracic		Without pre-oper chemo	DDP +VP16 + IFO/radio	>18 M	Advanced	Nonamp	nonHigh	Male	Differentiating	Low	0	1887	0	1887
P152	Primary_adrenal gland		Without pre-oper chemo	na	<18 M	Advanced	Amp	nonHigh	Male	Differentiating	Low	0	2016	0	2016
P153	Primary_adrenal gland		Without pre-oper chemo	na	>18 M	Advanced	Nonamp	nonHigh	Female	Differentiating	Intermediate	0	1864	0	1864
P154	Primary_adrenal gland		na	radio/na/IVT	>18 M	Advanced	Nonamp	High	Male	Undifferentiated or Poorly Differentiated	Intermediate	0	1954	1	108
P155	Primary_adrenal gland		na	recurrence followed by IVT	>18 M	Advanced	Nonamp	High	Male	Differentiating	Low	1	396	1	396
P156	Primary_retroperitoneal		CAV/EP	CAV/EP	<18 M	Early	Nonamp	nonHigh	Female	Differentiating	Low	0	1972	0	1972
P162	Primary_retroperitoneal		Without pre-oper chemo	No chemo applied	<18 M	Early	Nonamp	nonHigh	Male	Differentiating	Low	0	2013	0	2013
P163	Primary_adrenal gland		CAV/VIP	IVT	>18 M	Advanced	Nonamp	High	Male	Undifferentiated or Poorly Differentiated	Low	1	919	1	919
P164	Primary_adrenal gland		Without pre-oper chemo	CAV/VIP/IVT /CTX+TPO/VP16+VRN	>18 M	Advanced	Nonamp	High	Male	Undifferentiated or Poorly Differentiated	Low	0	2193	0	2193
P167	Primary_retroperitoneal		CAV/EP	DDP+VP16	<18 M	Advanced	Nonamp	nonHigh	Male	Differentiating	Low	0	2255	0	2255
P169	Primary_adrenal gland		na	radio	>18 M	Advanced	Amp	High	Male	Undifferentiated or Poorly Differentiated	Low	0	1386	0	1386
P170	Primary_adrenal gland		CAV/VIP	CAV/VIP/IVT	>18 M	Advanced	Nonamp	High	Male	Differentiating	Low	1	221	1	172
P171	Primary_adrenal gland		EP/ICE/CEDC	na	>18 M	Advanced	Nonamp	High	Male	Differentiating	Low	1	287	1	287
P172	Primary_retroperitoneal		CAV/VIP	VIP/radio/recurrence/IVT /nedaplatin+IFO	>18 M	Advanced	Amp	High	Male	Differentiating	High	1	1413	1	756
P173	Primary_adrenal gland		Without pre-oper chemo	CAV/VIP/IVT/CTX+TPO/VP16+VRN/IVT/CAV	>18 M	Advanced	Nonamp	High	Male	Undifferentiated or Poorly Differentiated	Low	0	2193	0	2193
P174	Primary_adrenal gland		na	No chemo applied	<18 M	Advanced	Nonamp	nonHigh	Male	Differentiating	Low	0	2594	1	216
P175	Primary_adrenal gland		Without pre-oper chemo	VIP /radio/o.r for CTX+TOP/VRN+VP16	<18 M	Advanced	Amp	High	Male	Undifferentiated or Poorly Differentiated	Low	0	1197	1	81
P176	Primary_adrenal gland		Without pre-oper chemo	CAV /radio/VIP/CAV	>18 M	Advanced	Amp	High	Male	Differentiating	Intermediate	1	368	1	359
P177	Primary_retroperitoneal		CAV/VIP	VIP	>18 M	Advanced	Nonamp	High	Male	Differentiating	Low	0	3099	1	837
P178	Primary_retroperitoneal		CAV/EP	CAV/EP/radio/IVT/VIP/Isotretinoin	<18 M	Advanced	Nonamp	nonHigh	Male	Differentiating	Intermediate	0	2447	0	2447
P181	Primary_adrenal gland		Without pre-oper chemo	na/no chemo applied	>18 M	Early	Nonamp	nonHigh	Male	Undifferentiated or Poorly Differentiated	Intermediate	0	2392	0	2392
P182	Primary_retroperitoneal		Without pre-oper chemo	CAV/VIP /radio/IVT	>18 M	Advanced	Nonamp	High	Male	Differentiating	Intermediate	1	1076	1	579
P183	Primary_retroperitoneal		CAV/VIP/IVT	IVT/IFO+CBP/IFO+DDP/surgery again/EP/radio/EP	>18 M	Advanced	Nonamp	High	Male	Differentiating	Intermediate	0	3083	1	3083
P184	Primary_adrenal gland		VCR+CTX+VP16/IFO+THP+CBP	VCR+CTX+VP16/ATO+IFO+THP+CBP/VIP/CTX+TPO+VCR	>18 M	Advanced	Nonamp	High	Male	Differentiating	Low	1	1312	1	492
P185	Primary_adrenal gland		na	IVT for /CTX+VP16/CTX+VRN	>18 M	Advanced	Nonamp	High	Male	Differentiating	Low	1	1130	1	618
P186	Primary_adrenal gland		EP/CAV/IE	CAV/EP	>18 M	Advanced	Nonamp	nonHigh	Female	Differentiating	Low	0	1209	0	1209
P187	Primary_adrenal gland		CAV/VIP/CTX+VCR+THP	IVT/radio/IVT/IC /CTX+TOP /CTX+TOP/VRN+VP16	>18 M	Advanced	Nonamp	High	Female	Differentiating	Low	1	964	1	483
P189	Primary_retroperitoneal		Without pre-oper chemo	No chemo applied	>18 M	Early	Nonamp	nonHigh	Female	Differentiating	Low	0	2553	0	2553
P191	Primary_adrenal gland		VCR+THP+Act-D	CAV/VIP	>18 M	Early	Amp	nonHigh	Male	Undifferentiated or Poorly Differentiated	Intermediate	1	396	1	396
P192	Primary_adrenal gland		Without pre-oper chemo	No chemo applied	>18 M	Advanced	Amp	nonHigh	Male	Undifferentiated or Poorly Differentiated	Intermediate	1	412	1	361
P195	Primary_adrenal gland		nedaplatin + ADM /ADM+VCR+CTX+dacarbazine /nedaplatin + ADM	nedaplatin+VP16；ADM+VCR+dacarbazine+CTX	>18 M	Advanced	Amp	High	Male	Differentiating	Low	1	312	1	312
P197	Primary_adrenal gland		na	nedaplatin+VP16/VCR+ dacarbazine + ADM + CTX /nedaplatin+VP16	<18 M	Advanced	Nonamp	nonHigh	Male	Undifferentiated or Poorly Differentiated	Low	0	2784	0	2784
P198	Primary_adrenal gland		na	VIP/CAV/radio/IVT	>18 M	Advanced	Amp	High	Male	Differentiating	Low	1	906	1	358
P199	Primary_adrenal gland		CAV/VIP	(o.r) CTX+VRN	>18 M	Advanced	Amp	High	Male	Differentiating	Low	0	383	1	344
P200	Primary_adrenal gland		Without pre-oper chemo	CAV/EP/CAV/VIP/radio	>18 M	Early	Nonamp	nonHigh	Female	Undifferentiated or Poorly Differentiated	Intermediate	0	945	0	945
P201	Primary_adrenal gland		Act-D+VCR+THP	CAV/EP/IVT /CTX+TPO+VCR/IVT	>18 M	Advanced	Nonamp	High	Male	Differentiating	Low	1	1445	1	42
P202	Primary_adrenal gland		CAV/VIP	CAV/VIP	>18 M	Advanced	Nonamp	High	Male	Undifferentiated or Poorly Differentiated	Low	1	189	1	189
P203	Primary_adrenal gland		CAV/VIP	No chemo applied	>18 M	Advanced	Nonamp	High	Female	Differentiating	Low	1	192	1	192
P204	Primary_adrenal gland		Without pre-oper chemo	DDP+VP16	<18 M	Early	Nonamp	nonHigh	Male	Undifferentiated or Poorly Differentiated	Low	0	2852	0	2852
P205	Primary_adrenal gland		CAV/VIP/CAV	No chemo applied	>18 M	Advanced	Nonamp	High	Male	Differentiating	Low	1	1106	1	1106
P206	Primary_adrenal gland		Without pre-oper chemo	CAV/EP	>18 M	Early	Nonamp	nonHigh	Female	Differentiating	Low	0	963	0	963
P207	Primary_adrenal gland		Without pre-oper chemo	EP/VIP/myelosuppression/CAV/VIP/CTX+VRN+VP-16	>18 M	Advanced	Amp	High	Female	Undifferentiated or Poorly Differentiated	Intermediate	0	733	0	733
P208	Primary_thoracic		Without pre-oper chemo	CAV/EP	<18 M	Early	Nonamp	nonHigh	Male	Undifferentiated or Poorly Differentiated	na	0	429	0	300
P209	Primary_adrenal gland		Without pre-oper chemo	CAP/VIP	>18 M	Advanced	Nonamp	High	Male	Undifferentiated or Poorly Differentiated	Low	0	2773	0	2773
P210	Primary_adrenal gland		Without pre-oper chemo	CAV/EP	<18 M	Advanced	Nonamp	nonHigh	Male	Undifferentiated or Poorly Differentiated	Low	0	583	0	583
P211	Primary_adrenal gland		Without pre-oper chemo	ATO+CAV/CD/CAP	>18 M	Advanced	Amp	High	Female	Undifferentiated or Poorly Differentiated	Low	0	856	0	856
P212	Primary_adrenal gland		Without pre-oper chemo	No chemo applied	>18 M	Advanced	Nonamp	High	Female	Undifferentiated or Poorly Differentiated	Low	0	1084	0	1084
P213	Primary_adrenal gland		Without pre-oper chemo	CAV/VIP	>18 M	Advanced	Nonamp	High	Male	Undifferentiated or Poorly Differentiated	Low	1	1112	1	402
P214	Primary_adrenal gland		Without pre-oper chemo	CTX+ADM+VCR	>18 M	Advanced	Nonamp	nonHigh	Male	Undifferentiated or Poorly Differentiated	Low	1	270	1	270
P216	Primary_adrenal gland		Without pre-oper chemo	nedaplatin+VP16	<18 M	Advanced	Nonamp	nonHigh	Male	Undifferentiated or Poorly Differentiated	Low	0	3641	0	3641
P218	Primary_adrenal gland		Without pre-oper chemo	CAV/EP	>18 M	Early	Amp	nonHigh	Male	Differentiating	Low	0	505	0	505
P221	Primary_adrenal gland		Without pre-oper chemo	nedaplatin+VP16	>18 M	Early	Nonamp	nonHigh	Female	Differentiating	Low	1	465	1	233
P222	Primary_adrenal gland		Without pre-oper chemo	CAV/EP	<18 M	Advanced	Nonamp	nonHigh	Female	Differentiating	Intermediate	0	3433	0	3433
P224	Primary_adrenal gland		Without pre-oper chemo	No chemo applied	<18 M	Early	Nonamp	nonHigh	Male	Undifferentiated or Poorly Differentiated	Low	0	3281	0	3281
P225	Primary_retroperitoneal		Without pre-oper chemo	nedaplatin+VP16+CAV	>18 M	Advanced	Nonamp	High	Male	Differentiating	Low	0	3355	0	3355
P226	Primary_adrenal gland		Without pre-oper chemo	na	>18 M	Advanced	Amp	High	Female	Undifferentiated or Poorly Differentiated	Low	1	246	1	109
P227	Primary_adrenal gland		Without pre-oper chemo	na	<18 M	Advanced	Nonamp	nonHigh	Female	Differentiating	Low	0	3313	0	3313
P228	Primary_adrenal gland		Without pre-oper chemo	No chemo applied	<18 M	Early	Nonamp	nonHigh	Male	Undifferentiated or Poorly Differentiated	Low	0	3161	0	3161
P229	Primary_adrenal gland		Without pre-oper chemo	na	>18 M	Advanced	Nonamp	High	Female	Differentiating	Intermediate	1	1583	1	516
P230	Primary_adrenal gland		Without pre-oper chemo	nedaplatin+VP16/CAV/VIP/radio/IVT/IFO+CBP	>18 M	Advanced	Nonamp	High	Male	Differentiating	Low	1	1336	1	629
P231	Primary_adrenal gland		Without pre-oper chemo	nedaplatin+VP16	>18 M	Advanced	Amp	High	Male	Undifferentiated or Poorly Differentiated	Low	0	3075	0	3075
P232	Primary_thoracic		Without pre-oper chemo	ADM+CTX+VCR+dacarbazine	<18 M	Advanced	Nonamp	nonHigh	Male	Undifferentiated or Poorly Differentiated	Low	0	3012	0	3012
P236	Primary_retroperitoneal		CTX+ADM+VCR+dacarbazine	CTX+ADM+VCR+dacarbazine	<18 M	Advanced	Nonamp	nonHigh	Female	Differentiating	Low	0	3111	0	3111
Abbreviations: na, not available; ATO, arsenic trioxide; IFO, ifosfamide; DDP, Cisplatin; CBP, carboplatin; CPT11, Irinotecan; VCR, vincristine; CTX, cyclophosphamide; VP16, etoposide; ADM, adriamycin; VRN, vinorelbine; CAV, CTX+ADM+VCR; VIP, VP16+IFO+DDP; CEDC, DDP+ADM+VP16+CTX; ICE, IFO+CBP+VP16; EP, VP16+DDP; CAV, CTX+ADM+VCR; VIP, VP16+IFO+DDP; IVT, IFO+CPT11; VDC, VCR+ADM+CTX; Act-D, Actinom…
