# Supplementary material for: Cross-cohort analysis identified an immune checkpoint-based signature to predict the clinical outcomes of neuroblastoma
Source: HighWire-hosted journal article supplement (doi:10.1136/jitc-2022-005980), 2023-05-01
Supplement: jitc-2022-005980supp009_data_supplement.pdf [file jitc-2022-005980supp009_data_supplement.pdf]

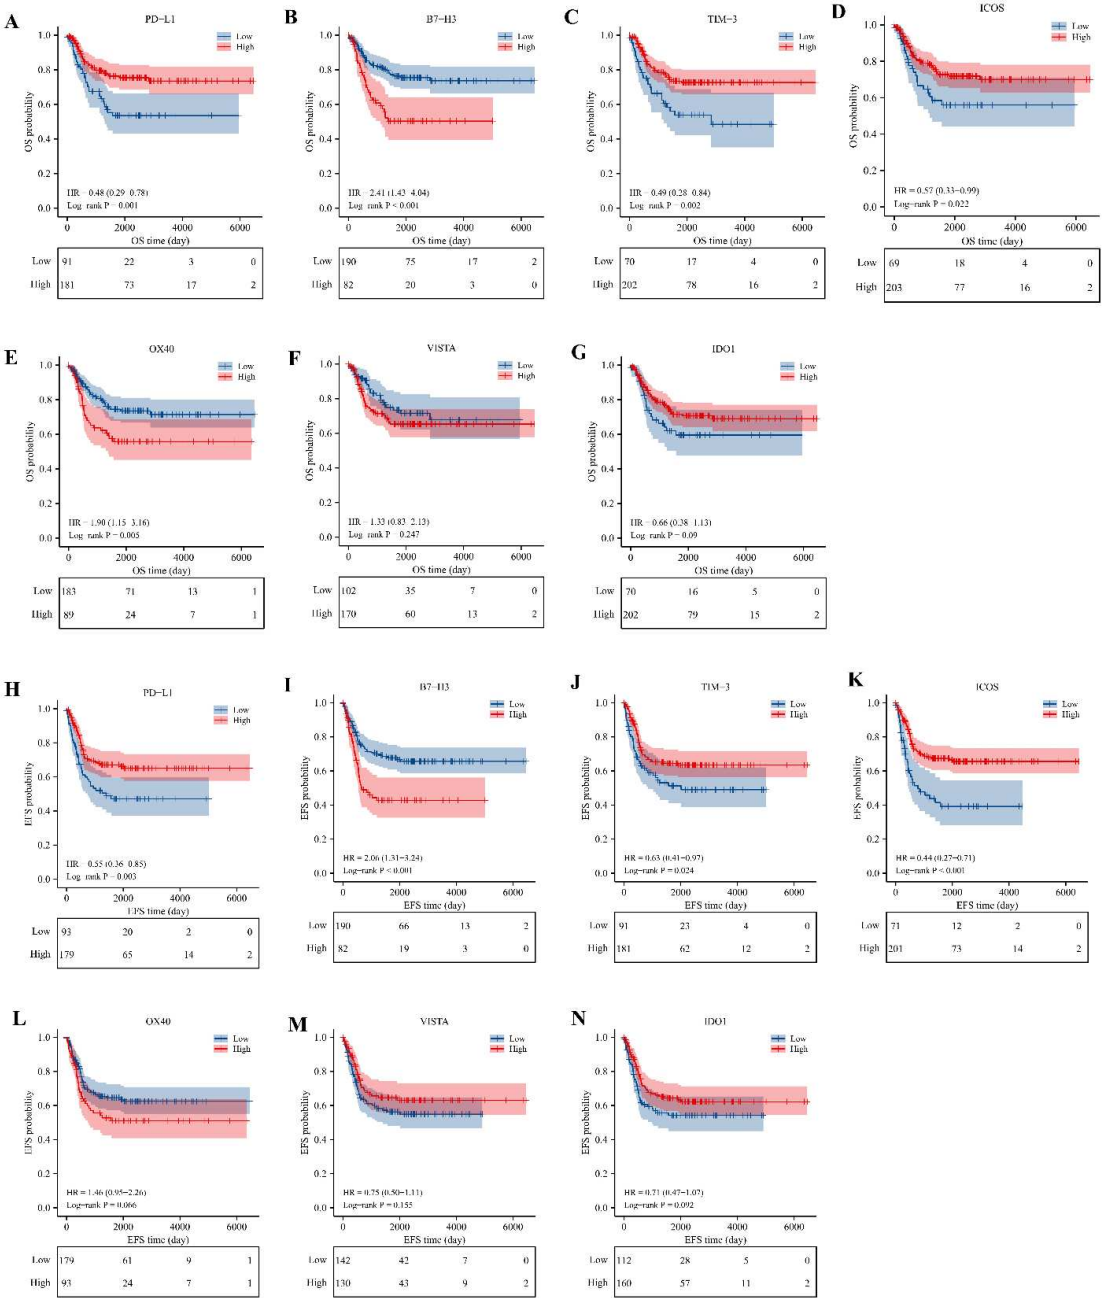

**Supplementary Figure S6.** Survival analysis of B7-H3, PD-L1, OX40, TIM-3, ICOS, VISTA and IDO1 expression in NB patients in the validation set (n = 272). Kaplan–Meier survival curves were generated according to the high and low expression of B7-H3, PD-L1, OX40, TIM-3, ICOS, VISTA and IDO1 (OS: A, B, C, D, E, F and G; EFS: H, I, J, K, L, M and N). *P* values were calculated by the log-rank test.

**Abbreviations:** NB, neuroblastoma; OS, overall survival; EFS, event-free survival; PD-L1, programmed death ligand 1; IDO1, indoleamine-pyrrole 2,3-dioxygenase 1; TIM-3, T cell immunoglobulin and mucin domain containing-3; OX40, costimulatory molecule 40; ICOS, inducible costimulatory molecule.
