# Supplementary material for: Cross-cohort analysis identified an immune checkpoint-based signature to predict the clinical outcomes of neuroblastoma
Source: HighWire-hosted journal article supplement (doi:10.1136/jitc-2022-005980), 2023-05-01
Supplement: jitc-2022-005980supp010_data_supplement.pdf [file jitc-2022-005980supp010_data_supplement.pdf]

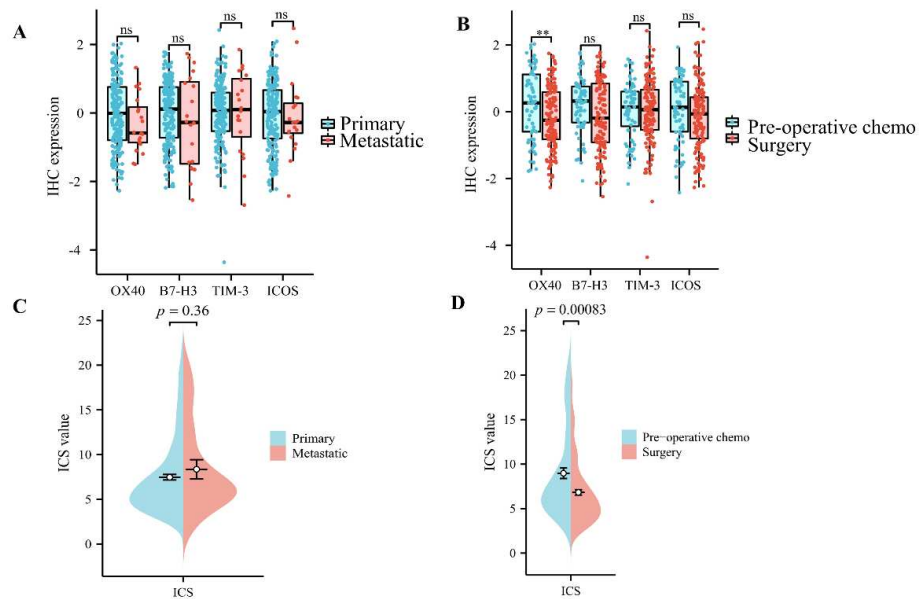

**Supplementary Figure S7.** The expression difference of the four immune checkpoints in primary and metastatic tumors (A), as well as in tumors first treated with surgery and pre-operative chemo strategies (B). Subsequently, the difference of the ICS value in primary tumors compared with the metastatic tumors (C), and tumors first treated with surgery and pre-operative chemo strategies (D), respectively. \*\* $P < 0.01$ ; ns, not significant.
