# Supplementary material for: Cross-cohort analysis identified an immune checkpoint-based signature to predict the clinical outcomes of neuroblastoma
Source: HighWire-hosted journal article supplement (doi:10.1136/jitc-2022-005980), 2023-05-01
Supplement: jitc-2022-005980supp012_data_supplement.xlsx [file jitc-2022-005980supp012_data_supplement.xlsx]

## Sheet: Sheet1
Supplementary Table S3. Cox regression analysis of factors associated with survival in all NB patients from the validation set
	Univariate			Multivariate
Factors	HR (95% CI)	P value		HR (95% CI)	P value
OS
Age, months (> 18 vs. < 18)	7.47 (4.08-13.71)	<0.001		2.68 (1.41-5.07)	0.002
INSS (Advanced vs. early)	21.73 (6.83-69.16)	<0.001		9.23 (2.70-31.61)	<0.001
MYCN (Amp vs. nonamp)	5.81 (3.63-9.27)	<0.001		2.00 (1.20-3.32)	0.007
ICS (High vs. low)	1.13 (1.07-1.20)	<0.001		1.12 (1.10-1.21)	<0.001
EFS
Age, months (> 18 vs. < 18)	4.31 (2.72-6.83)	<0.001		1.98 (1.18-3.30)	0.009
INSS (Advanced vs. early)	6.86 (3.65-12.90)	<0.001		3.65 (1.78-7.47)	<0.001
MYCN (Amp vs. nonamp)	3.88 (2.57-5.86)	<0.001		1.73 (1.10-2.72)	0.017
ICS (High vs. low)	1.10 (1.04-1.15)	<0.001		1.07 (1.01-1.14)	0.014
Abbreviations: NB, neuroblastoma; INSS, the International Neuroblastoma Staging System; ICS, immune checkpoint-based signature; OS, overall survival; EFS, event-free survival; HR, hazard ratio; CI, confidence interval; Statistically significant P values are shown in bold.
