# Supplementary material for: Cross-cohort analysis identified an immune checkpoint-based signature to predict the clinical outcomes of neuroblastoma
Source: HighWire-hosted journal article supplement (doi:10.1136/jitc-2022-005980), 2023-05-01
Supplement: jitc-2022-005980supp013_data_supplement.pdf [file jitc-2022-005980supp013_data_supplement.pdf]

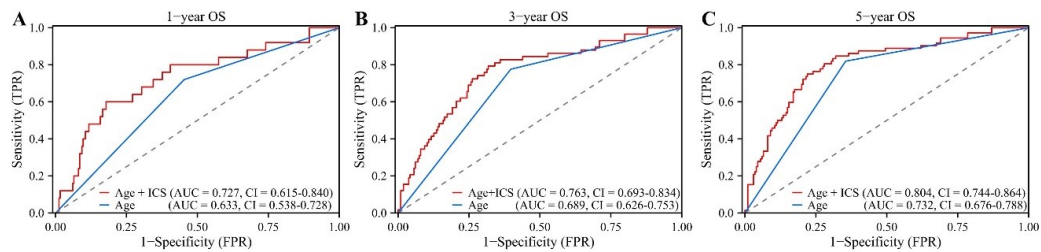

**Supplementary Figure S9.** Comparisons of the sensitivity and specificity for predicting 1-year, 3-year and 5-year OS in the validation set. ROC curves of nomograms A (ICS + age) and B (age only) as predictors of 1-year (A), 3-year (B) and 5-year (C) OS.

**Abbreviations:** OS, overall survival; ICS, immune checkpoint-based signature; ROC, receiver operating characteristic.
