# Supplementary material for: Cross-cohort analysis identified an immune checkpoint-based signature to predict the clinical outcomes of neuroblastoma
Source: HighWire-hosted journal article supplement (doi:10.1136/jitc-2022-005980), 2023-05-01
Supplement: jitc-2022-005980supp014_data_supplement.xlsx [file jitc-2022-005980supp014_data_supplement.xlsx]

## Sheet: Sheet1
Supplementary Table S4. Summary of the sensitivity and specificity of nomogram A (ICS+age) and B (age only) associated with survival in all NB patients in the discovery and validation sets, respectively
Dataset	OS	Nomogram	Sensitivity	Specificity	Accuracy	True Positive	True Negative	False Positive	False Negative	Youden's index
Discovery set	1-year	A	0.923077	0.864322	0.86792	12	172	27	1	0.787399
		B	0.923077	0.427136	0.45755	12	85	114	1	0.350213
	3-year	A	0.794872	0.849711	0.83962	31	147	26	8	0.644583
		B	0.923077	0.479769	0.56132	36	83	90	3	0.402846
	5-year	A	0.836735	0.895706	0.88208	41	146	17	8	0.73244
		B	0.938776	0.509202	0.60849	46	83	80	3	0.447978
Validation set	1-year	A	0.6	0.821862	0.80147	15	203	44	10	0.421862
		B	0.72	0.546559	0.5625	18	135	112	7	0.266559
	3-year	A	0.793103	0.682243	0.70588	46	146	68	12	0.475346
		B	0.775862	0.602804	0.63971	45	129	85	13	0.378666
	5-year	A	0.75	0.78	0.77206	54	156	44	18	0.53
		B	0.819444	0.645	0.69118	59	129	71	13	0.464444
Abbreviations: ICS, immune checkpoint-based signature; OS, overall survival; NB, neuroblastoma.
